# Supplementary material
Source: PubMed Central journal article supplement (PMC3247703)
Supplement: Supp_Data.pdf [file Supp_Data.pdf]

## Supplementary Data

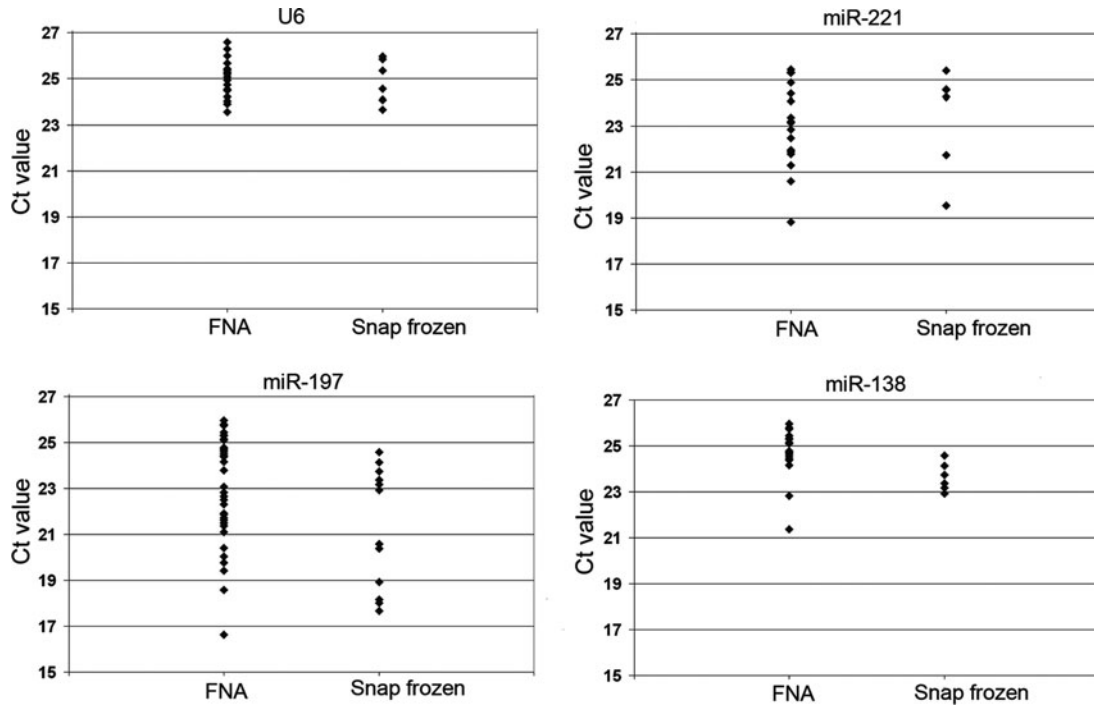

**SUPPLEMENTARY FIG. S1.** Real-time PCR Ct values of U6, miR-221, -197, and -138. FNA, archived FNA samples ( $n=18$ ); snap-frozen, fresh snap-frozen samples of two normal thyroid tissues, two PTC tumors, and two paired nonaffected thyroid tissues ( $n=6$ ). PCR, polymerase chain reaction; FNA, fine needle aspiration; miR, microRNA.

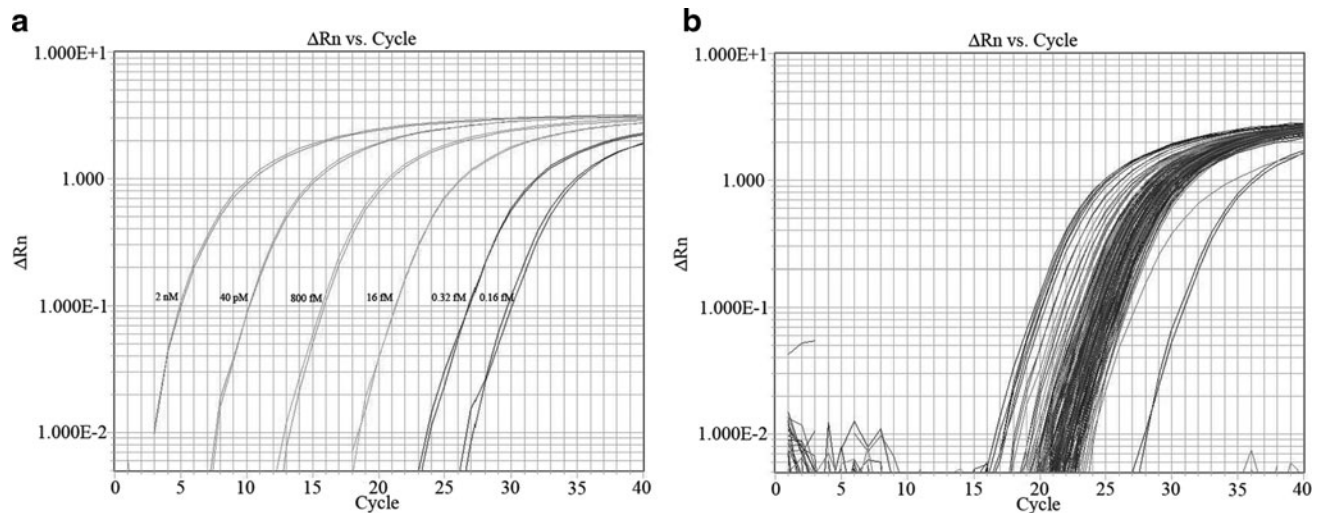

**SUPPLEMENTARY FIG. S2.** Amplification plots of miR-197 in the TaqMan real-time PCR miR assay. (a) Amplification plots of synthetic miR-197 with 50 ng yeast tRNA present as complex background. Target input ranges between 2 nM and 0.2 fM in a reaction. (b) Amplification plots of miR-197 detected in RNA samples extracted from thyroid FNA specimens.

SUPPLEMENTARY TABLE S1. 4-MiCRORNA PREDICTIONS IN THE TRAINING SAMPLE SET

| Sample ID | FNA category <sup>a</sup> | Histological diagnosis | 4-miR prediction |                     |
|-----------|---------------------------|------------------------|------------------|---------------------|
|           |                           |                        | LDA              | Logistic regression |
| S1        | Atypia                    | NH                     | Benign           | Benign              |
| S2        | Atypia                    | NH                     | Benign           | Benign              |
| S3        | Atypia                    | NNG                    | Benign           | Benign              |
| S4        | Atypia                    | FA                     | Benign           | Benign              |
| S5        | Atypia                    | FA                     | Benign           | Benign              |
| S6        | Atypia                    | FA                     | Benign           | Benign              |
| S7        | Atypia                    | FA                     | Benign           | Benign              |
| S8        | Atypia                    | FA                     | Benign           | Benign              |
| S9        | Atypia                    | FA                     | Benign           | Benign              |
| S10       | Atypia                    | HA                     | Benign           | Malignant           |
| S11       | Atypia                    | NH                     | Benign           | Benign              |
| S12       | Atypia                    | NH                     | Benign           | Benign              |
| S13       | Atypia                    | NH                     | Benign           | Benign              |
| S14       | Atypia                    | NH                     | Benign           | Benign              |
| S15       | Atypia                    | NH                     | Benign           | Benign              |
| S16       | Atypia                    | NH                     | Malignant        | Malignant           |
| S17       | Atypia                    | ATC                    | Malignant        | Malignant           |
| S18       | Atypia                    | FTC                    | Malignant        | Malignant           |
| S19       | Atypia                    | FTC                    | Malignant        | Malignant           |
| S20       | Atypia                    | FTC                    | Benign           | Benign              |
| S21       | Atypia                    | fvPTC                  | Malignant        | Malignant           |
| S22       | Atypia                    | fvPTC                  | Malignant        | Malignant           |
| S23       | Atypia                    | fvPTC                  | Malignant        | Malignant           |
| S24       | Atypia                    | fvPTC                  | Malignant        | Malignant           |
| S25       | Atypia                    | PTC                    | Malignant        | Malignant           |
| S26       | Suspicious                | FTC                    | Malignant        | Malignant           |
| S27       | Suspicious                | FTC                    | Malignant        | Malignant           |
| S28       | Suspicious                | PTC                    | Malignant        | Malignant           |
| S29       | Suspicious                | PTC                    | Malignant        | Malignant           |
| S30       | Suspicious                | PTC                    | Malignant        | Malignant           |
| S31       | Malignant                 | ATC                    | Benign           | Malignant           |
| S32       | Malignant                 | ATC                    | Malignant        | Malignant           |
| S33       | Malignant                 | PTC                    | Benign           | Malignant           |
| S34       | Malignant                 | PTC                    | Malignant        | Malignant           |
| S35       | Malignant                 | PTC                    | Malignant        | Malignant           |
| S36       | Malignant                 | PTC                    | Malignant        | Malignant           |
| S37       | Malignant                 | PTC                    | Malignant        | Malignant           |
| S38       | Malignant                 | PTC                    | Malignant        | Malignant           |
| S39       | Malignant                 | PTC                    | Malignant        | Malignant           |
| S40       | Malignant                 | PTC                    | Malignant        | Malignant           |
| S41       | Malignant                 | PTC                    | Malignant        | Malignant           |
| S42       | Malignant                 | PTC                    | Malignant        | Malignant           |
| S43       | Malignant                 | PTC                    | Malignant        | Malignant           |
| S44       | Malignant                 | PTC                    | Malignant        | Malignant           |
| S45       | Malignant                 | PTC                    | Malignant        | Malignant           |
| S46       | Malignant                 | PTC                    | Malignant        | Malignant           |
| S47       | Malignant                 | PTC                    | Malignant        | Malignant           |
| S48       | Malignant                 | PTC                    | Malignant        | Malignant           |
| S49       | Malignant                 | PTC                    | Malignant        | Malignant           |
| S50       | Malignant                 | PTC                    | Malignant        | Malignant           |
| S51       | Malignant                 | PTC                    | Malignant        | Malignant           |
| S52       | Malignant                 | PTC                    | Malignant        | Malignant           |
| S53       | Malignant                 | PTC                    | Malignant        | Malignant           |
| S54       | Malignant                 | PTC                    | Malignant        | Malignant           |
| S55       | Malignant                 | PTC                    | Malignant        | Malignant           |
| S56       | Malignant                 | PTC                    | Malignant        | Malignant           |
| S57       | Malignant                 | PTC                    | Malignant        | Malignant           |
| S58       | Malignant                 | PTC                    | Malignant        | Malignant           |
| S59       | Malignant                 | PTC                    | Malignant        | Malignant           |
| S60       | Malignant                 | PTC                    | Malignant        | Malignant           |

<sup>a</sup>FNA category was based on the Bethesda system for thyroid cytopathology.

FA, follicular adenoma; NH, nodular hyperplasia; NNG, non-neoplastic goiter; HA, Hurthle adenoma; ATC, anaplastic thyroid carcinoma; FTC, follicular thyroid carcinoma; fvPTC, follicular variant papillary thyroid carcinoma; PTC, conventional papillary thyroid carcinoma; FNA, fine needle aspiration; LDA, linear discriminant analysis; miR, microRNA.

SUPPLEMENTARY TABLE S2. 4-MICRORNA PREDICTIONS IN THE VALIDATION SAMPLE SET

| Sample ID | FNA category <sup>a</sup> | Histological diagnosis | 4-miR prediction |                     |
|-----------|---------------------------|------------------------|------------------|---------------------|
|           |                           |                        | LDA              | Logistic regression |
| S61       | Atypia                    | FA                     | Benign           | Benign              |
| S62       | Atypia                    | FA                     | Benign           | Benign              |
| S63       | Atypia                    | FA                     | Benign           | Benign              |
| S64       | Atypia                    | FA                     | Benign           | Benign              |
| S65       | Atypia                    | FA                     | Benign           | Benign              |
| S66       | Atypia                    | FA                     | Benign           | Benign              |
| S67       | Atypia                    | FA                     | Malignant        | Malignant           |
| S68       | Atypia                    | FA                     | Malignant        | Malignant           |
| S69       | Atypia                    | HA                     | Benign           | Benign              |
| S70       | Atypia                    | HA                     | Benign           | Malignant           |
| S71       | Atypia                    | HA                     | Malignant        | Malignant           |
| S72       | Atypia                    | LT                     | Benign           | Benign              |
| S73       | Atypia                    | NH                     | Benign           | Benign              |
| S74       | Atypia                    | NH                     | Benign           | Benign              |
| S75       | Atypia                    | NH                     | Benign           | Benign              |
| S76       | Atypia                    | NH                     | Malignant        | Benign              |
| S77       | Atypia                    | NNG                    | Benign           | Benign              |
| S78       | Atypia                    | NNG                    | Benign           | Benign              |
| S79       | Atypia                    | NNG                    | Benign           | Benign              |
| S80       | Atypia                    | FTC                    | Benign           | Benign              |
| S81       | Atypia                    | FTC                    | Benign           | Benign              |
| S82       | Atypia                    | FTC                    | Benign           | Benign              |
| S83       | Atypia                    | FTC                    | Malignant        | Malignant           |
| S84       | Atypia                    | FTC                    | Malignant        | Malignant           |
| S85       | Atypia                    | FTC                    | Malignant        | Benign              |
| S86       | Atypia                    | fvPTC                  | Benign           | Benign              |
| S87       | Atypia                    | fvPTC                  | Malignant        | Malignant           |
| S88       | Atypia                    | PTC                    | Malignant        | Malignant           |
| S89       | Atypia                    | PTC                    | Malignant        | Malignant           |
| S90       | Atypia                    | PTC                    | Malignant        | Malignant           |
| S91       | Follicular neoplasm       | FA                     | Benign           | Benign              |
| S92       | Follicular neoplasm       | FA                     | Malignant        | Benign              |
| S93       | Follicular neoplasm       | NH                     | Benign           | Benign              |
| S94       | Follicular neoplasm       | NH                     | Benign           | Malignant           |
| S95       | Follicular neoplasm       | NNG                    | Benign           | Benign              |
| S96       | Suspicious                | fvPTC                  | Malignant        | Malignant           |
| S97       | Suspicious                | PTC                    | Malignant        | Malignant           |
| S98       | Suspicious                | PTC                    | Malignant        | Malignant           |
| S99       | Malignant                 | FTC                    | Malignant        | Malignant           |
| S100      | Malignant                 | FTC                    | Malignant        | Malignant           |
| S101      | Malignant                 | PTC                    | Benign           | Benign              |
| S102      | Malignant                 | PTC                    | Malignant        | Malignant           |
| S103      | Malignant                 | PTC                    | Malignant        | Malignant           |
| S104      | Malignant                 | PTC                    | Malignant        | Malignant           |
| S105      | Malignant                 | PTC                    | Malignant        | Malignant           |
| S106      | Malignant                 | PTC                    | Malignant        | Malignant           |
| S107      | Malignant                 | PTC                    | Malignant        | Malignant           |
| S108      | Malignant                 | PTC                    | Malignant        | Malignant           |
| S109      | Malignant                 | PTC                    | Malignant        | Malignant           |
| S110      | Malignant                 | PTC                    | Malignant        | Malignant           |
| S111      | Malignant                 | PTC                    | Malignant        | Malignant           |
| S112      | Malignant                 | PTC                    | Malignant        | Malignant           |
| S113      | Malignant                 | PTC                    | Malignant        | Malignant           |
| S114      | Malignant                 | PTC                    | Malignant        | Malignant           |
| S115      | Malignant                 | PTC                    | Malignant        | Malignant           |
| S116      | Malignant                 | PTC                    | Malignant        | Malignant           |
| S117      | Malignant                 | PTC                    | Malignant        | Malignant           |
| S118      | Malignant                 | PTC                    | Malignant        | Malignant           |
| S119      | Malignant                 | PTC                    | Malignant        | Malignant           |
| S120      | Malignant                 | PTC                    | Malignant        | Malignant           |

(continued)

SUPPLEMENTARY TABLE S2. (CONTINUED)

| <i>Sample ID</i> | <i>FNA category</i> <sup>a</sup> | <i>Histological diagnosis</i> | <i>4-miR prediction</i> |                            |
|------------------|----------------------------------|-------------------------------|-------------------------|----------------------------|
|                  |                                  |                               | <i>LDA</i>              | <i>Logistic regression</i> |
| S121             | Malignant                        | PTC                           | Malignant               | Malignant                  |
| S122             | Malignant                        | PTC                           | Malignant               | Malignant                  |
| S123             | Malignant                        | PTC                           | Malignant               | Malignant                  |
| S124             | Malignant                        | PTC                           | Malignant               | Malignant                  |
| S125             | Malignant                        | PTC                           | Malignant               | Malignant                  |
| S126             | Malignant                        | PTC                           | Malignant               | Malignant                  |
| S127             | Malignant                        | PTC                           | Malignant               | Malignant                  |
| S128             | Malignant                        | PTC                           | Malignant               | Malignant                  |

<sup>a</sup>FNA category was based on the Bethesda system for thyroid cytopathology.  
 LT, lymphocytic thyroiditis.
